# Supplementary material
Source: PubMed Central journal article supplement (PMC3748490)
Supplement: SD2.pdf [file SD2.pdf]

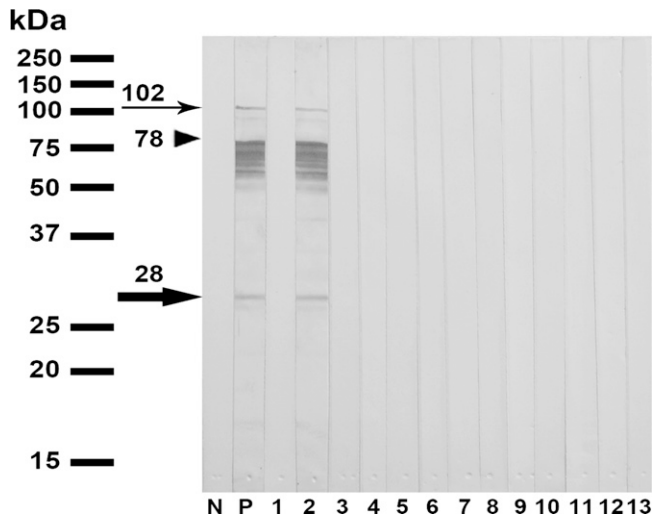

SUPPLEMENTAL FIGURE 1. Representative immunoblotting patterns reacted with the recombinant MMP-like protein cleaved with rEK. Antigens were probed with 1:100 diluted sera from pooled negative controls (N), pooled human gnathostomiasis patients (P), healthy control (1), parasitologically confirmed gnathostomiasis (2), cysticercosis (3), angiostrongyliasis (4), paragonimiasis (5), fascioliasis (6), trichinosis (7), ascariasis (8), opisthorchiasis viverrini (9), strongyloidiasis (10), taeniasis (11), capillariasis (12), and hookworm infection (13). A thin arrow indicates the position of the remnant fusion-tagged MMP-like protein (102 kDa) after partial digestion. An arrow head indicates the position of the fusion-tagged protein alone (78 kDa). A thick arrow indicates the specific immunoreactive band of the rEK-cleaved MMP-like protein (28 kDa). The partially digested MMP-fusion proteins (below 78 kDa) smear bands were also shown.
